# Supplementary material for: Aqueous synthesis of lithium superionic-conducting complex hydride solid electrolytes
Source: Royal Society of Chemistry journal article supplement (doi:10.1039/d4ta05962j), 2024-01-01
Supplement: d4ta05962j1.pdf [file d4ta05962j1.pdf]

## Supplementary material

### Aqueous synthesis of lithium superionic-conducting complex hydride solid electrolytes

Hyerim Kim<sup>a</sup>, Taehyun Kim<sup>a</sup>, Seunghee Joo<sup>a</sup>, Jeonghyun Kim<sup>a</sup>, Jaehyun Noh<sup>a,b</sup>, Jiyoung Ma<sup>b</sup> Jung-Je Woo<sup>b</sup>,  
Seungho Choi<sup>c</sup>, Kyungsu Kim<sup>c</sup>, Woosuk Cho<sup>c</sup>, Kazuaki Kisu<sup>d</sup>, Shin-ichi Orimo<sup>d,e</sup>, and Sangryun Kim<sup>a,\*</sup>

<sup>a</sup>*Graduate School of Energy Convergence, Gwangju Institute of Science and Technology (GIST), 123  
Cheomdangwagi-ro, Gwangju 61005, Republic of Korea*

<sup>b</sup>*Gwangju Clean Energy Research Center, Korea Institute of Energy Research (KIER), 270-25 Samsu-ro,  
Gwangju 61003, Republic of Korea*

<sup>c</sup>*Advanced Batteries Research Center, Korea Electronics Technology Institute, 25 Saenari-ro, Seongnam 13509,  
Republic of Korea*

<sup>d</sup>*Institute for Materials Research (IMR), Tohoku University, Katahira 2-1-1, Sendai 980-8577, Japan*

<sup>e</sup>*WPI-Advanced Institute for Materials Research (WPI-AIMR), Tohoku University, Katahira 2-1-1, Sendai  
980-8577, Japan*

\*Corresponding author

*E-mail address:* sangryun@gist.ac.kr



**Fig. S1.** FE-SEM images of  $\text{Li}(\text{CB}_9\text{H}_{10})_{0.7}(\text{CB}_{11}\text{H}_{12})_{0.3}$  prepared by the liquid-phase synthesis: (a) Scale bar, 100  $\mu\text{m}$ , (b) Scale bar, 20  $\mu\text{m}$ , and (c) Scale bar, 5  $\mu\text{m}$ .

**Table S1.** Ionic conductivities and activation energies of  $\text{Li}(\text{CB}_9\text{H}_{10})_{0.7}(\text{CB}_{11}\text{H}_{12})_{0.3}$  prepared by solid-phase and liquid-phase synthesis.

| Material                                                                       | Synthetic method | Ionic conductivity ( $\text{S cm}^{-1}$ ) | Activation energy ( $\text{kJ mol}^{-1}$ ) | References    |
|--------------------------------------------------------------------------------|------------------|-------------------------------------------|--------------------------------------------|---------------|
| $\text{Li}(\text{CB}_9\text{H}_{10})_{0.7}(\text{CB}_{11}\text{H}_{12})_{0.3}$ | Solid-phase      | $6.7 \times 10^{-3}$ (25 °C)              | 28.4                                       | 1             |
|                                                                                |                  | $8.5 \times 10^{-2}$ (110 °C)             |                                            |               |
|                                                                                | Liquid-phase     | $6.6 \times 10^{-3}$ (25 °C)              | 29.2                                       | Present study |
|                                                                                |                  | $9.5 \times 10^{-2}$ (110 °C)             |                                            |               |



**Fig. S2.** (a) XRD patterns of  $\text{Li}(\text{CB}_9\text{H}_{10})$ ,  $\text{Li}(\text{CB}_{11}\text{H}_{12})$ , and  $\text{Li}(\text{CB}_9\text{H}_{10})_{0.7}(\text{CB}_{11}\text{H}_{12})_{0.3}$  before and after moisture exposure at a dew point of  $-50\text{ }^\circ\text{C}$  for 12 h. (b) Change in the weight of the  $\text{Li}(\text{CB}_9\text{H}_{10})_{0.7}(\text{CB}_{11}\text{H}_{12})_{0.3}$  powder during moisture exposure at a dew point of  $-50\text{ }^\circ\text{C}$ .



**Fig. S3.** Nyquist plots of  $\text{Li}(\text{CB}_9\text{H}_{10})_{0.7}(\text{CB}_{11}\text{H}_{12})_{0.3}$  at 25 °C before and after moisture exposure at a dew point of  $-50$  °C for 12 h.

**Table S2.** Used solvents, synthetic temperatures, and ionic conductivities of various solid electrolytes synthesized by the liquid–phase method.

| Material                                                                                               | Solvent               | Synthetic temperature <sup>a</sup> (°C) | Ionic conductivity <sup>b</sup> (S cm <sup>-1</sup> ) | References |
|--------------------------------------------------------------------------------------------------------|-----------------------|-----------------------------------------|-------------------------------------------------------|------------|
| Li(CB <sub>9</sub> H <sub>10</sub> ) <sub>0.7</sub> (CB <sub>11</sub> H <sub>12</sub> ) <sub>0.3</sub> | DI water              | 200                                     | 6.6 × 10 <sup>-3</sup>                                | This work  |
| Li <sub>7</sub> P <sub>2</sub> S <sub>8</sub> I                                                        | ACN <sup>c</sup>      | 200                                     | 6.3 × 10 <sup>-4</sup>                                | 2          |
| Li <sub>7</sub> P <sub>2</sub> S <sub>8</sub> I                                                        | EP <sup>d</sup>       | 170                                     | 4.7 × 10 <sup>-4</sup>                                | 3          |
| Li <sub>7</sub> P <sub>3</sub> S <sub>11</sub>                                                         | ACN                   | 180                                     | 1.0 × 10 <sup>-3</sup>                                | 4          |
| Li <sub>7</sub> P <sub>3</sub> S <sub>11</sub>                                                         | THF <sup>e</sup> –ACN | 250                                     | 9.7 × 10 <sup>-4</sup>                                | 5          |
| Li <sub>7</sub> P <sub>3</sub> S <sub>11</sub>                                                         | ACN                   | 260                                     | 1.5 × 10 <sup>-3</sup>                                | 6          |
| Li <sub>7</sub> P <sub>3</sub> S <sub>11</sub>                                                         | DME <sup>f</sup>      | 250                                     | 2.7 × 10 <sup>-4</sup>                                | 7          |
| Li <sub>6</sub> PS <sub>5</sub> Cl                                                                     | Ethanol–THF           | 550                                     | 2.2 × 10 <sup>-3</sup>                                | 8          |
| Li <sub>6</sub> PS <sub>5</sub> Cl                                                                     | ACN–PTH <sup>g</sup>  | 550                                     | 2.8 × 10 <sup>-3</sup>                                | 9          |
| Li <sub>6</sub> PS <sub>5</sub> Cl                                                                     | EA <sup>h</sup>       | 550                                     | 1.1 × 10 <sup>-3</sup>                                | 10         |
| Li <sub>6</sub> PS <sub>5</sub> Cl                                                                     | Ethanol               | 80                                      | 1.4 × 10 <sup>-5</sup>                                | 11         |
| Li <sub>6</sub> PS <sub>5</sub> Cl                                                                     | Ethanol–ACN           | 180                                     | 6 × 10 <sup>-4</sup>                                  | 12         |
| Li <sub>6</sub> PS <sub>5</sub> Cl                                                                     | THF–Ethanol           | 550                                     | 2.4 × 10 <sup>-3</sup>                                | 13         |
| Li <sub>6</sub> PS <sub>5</sub> Cl                                                                     | THF                   | 550                                     | 2.2 × 10 <sup>-3</sup>                                | 14         |
| Li <sub>6</sub> PS <sub>5</sub> Cl                                                                     | Anisole–Ethanol       | 550                                     | 2.1 × 10 <sup>-3</sup>                                | 15         |
| Li <sub>10</sub> GeP <sub>2</sub> S <sub>12</sub>                                                      | ACN–THF–Ethanol       | 550                                     | 1.6 × 10 <sup>-3</sup>                                | 16         |
| Li <sub>7</sub> PS <sub>6</sub>                                                                        | Ethanol               | 200                                     | 1.1 × 10 <sup>-4</sup>                                | 17         |
| Li <sub>6</sub> PS <sub>5</sub> Br                                                                     | THF–Ethanol           | 550                                     | 1.4 × 10 <sup>-3</sup>                                | 18         |
| Li <sub>6</sub> PS <sub>5</sub> Br                                                                     | EP–Ethanol            | 180                                     | 3.4 × 10 <sup>-5</sup>                                | 19         |
| Li <sub>6</sub> PS <sub>5</sub> Br                                                                     | Ethanol               | 150                                     | 1.9 × 10 <sup>-4</sup>                                | 20         |
| β–Li <sub>3</sub> PS <sub>4</sub>                                                                      | THF                   | 140                                     | 1.6 × 10 <sup>-4</sup>                                | 21         |
| β–Li <sub>3</sub> PS <sub>4</sub>                                                                      | EA                    | 160                                     | 3.3 × 10 <sup>-4</sup>                                | 22         |
| β–Li <sub>3</sub> PS <sub>4</sub>                                                                      | ACN                   | 200                                     | 1.2 × 10 <sup>-4</sup>                                | 23         |
| β–Li <sub>3</sub> PS <sub>4</sub>                                                                      | THF                   | 140                                     | 1.3 × 10 <sup>-4</sup>                                | 24         |
| Li <sub>4</sub> PS <sub>4</sub> I                                                                      | DME                   | 200                                     | 1.2 × 10 <sup>-4</sup>                                | 25         |
| Li <sub>3</sub> PS <sub>4</sub> –LiBH <sub>4</sub>                                                     | THF                   | 160                                     | 6.0 × 10 <sup>-3</sup>                                | 26         |
| Li <sub>6.5</sub> P <sub>0.5</sub> GE <sub>0.5</sub> S <sub>5</sub> I                                  | Ethanol               | 180                                     | 5.4 × 10 <sup>-4</sup>                                | 27         |

|                                                                       |                                         |      |                      |    |
|-----------------------------------------------------------------------|-----------------------------------------|------|----------------------|----|
| $\text{Li}_2\text{S}-\text{P}_2\text{S}_5$                            | Dibutyl ether                           | 165  | $3.1 \times 10^{-4}$ | 28 |
| $\text{Li}_3\text{InCl}_6$                                            | DI water <sup>i</sup>                   | 200  | $2.0 \times 10^{-3}$ | 29 |
| $\text{Li}_{3.2}\text{P}_{0.8}\text{Sn}_{0.2}\text{S}_4$              | EDA <sup>j</sup> -EDT <sup>k</sup> -THF | 260  | $1.9 \times 10^{-4}$ | 30 |
| $\text{Li}_4\text{SnS}_4$                                             | DI water                                | 320  | $1.4 \times 10^{-4}$ | 31 |
| $0.6\text{Li}_4\text{SnS}_4-0.4\text{LiI}$                            | Methanol                                | 200  | $4.1 \times 10^{-4}$ | 32 |
| $\text{Li}_{6.28}\text{Al}_{0.24}\text{La}_3\text{Zr}_2\text{O}_{12}$ | DI water                                | 1200 | $5.1 \times 10^{-4}$ | 33 |
| $\text{Li}_7\text{La}_3\text{Zr}_{1.89}\text{Al}_{0.15}\text{O}_{12}$ | Nitric acid                             | 1150 | $3.4 \times 10^{-4}$ | 34 |
| $\text{Li}_{1.4}\text{Al}_{0.4}\text{Ge}_{1.6}(\text{PO}_4)_3$        | Ethylene glycol                         | 900  | $1.2 \times 10^{-3}$ | 35 |

<sup>a</sup>The highest heat treatment temperature in the previous reports; <sup>b</sup>Room temperature (22–30 °C) conductivity of the cold-pressed samples; <sup>c</sup>ACN, acetonitrile; <sup>d</sup>EP, ethyl propionate; <sup>e</sup>THF, tetrahydrofuran; <sup>f</sup>DME, 1,2-dimethoxyethane; <sup>g</sup>PTH, 1-propanethiol; <sup>h</sup>EA, ethyl acetate; <sup>i</sup>DI water, deionized water; <sup>j</sup>EDA, 1,2-ethylenediamine; <sup>k</sup>EDT, 1,2-ethanedithiol.

**Table S3.** Ionic conductivities of various solid electrolytes synthesized by the solid-phase and liquid-phase methods.

| Material                                                                                               | Ionic conductivity <sup>a</sup><br>(S cm <sup>-1</sup> ) |                        | $\left 1 - \frac{\sigma_{\text{Liquid-phase}}}{\sigma_{\text{Solid-phase}}}\right $ | References                         |                        |
|--------------------------------------------------------------------------------------------------------|----------------------------------------------------------|------------------------|-------------------------------------------------------------------------------------|------------------------------------|------------------------|
|                                                                                                        | Solid-phase synthesis                                    | Liquid-phase synthesis |                                                                                     | Solid-phase synthesis <sup>b</sup> | Liquid-phase synthesis |
| Li(CB <sub>9</sub> H <sub>10</sub> ) <sub>0.7</sub> (CB <sub>11</sub> H <sub>12</sub> ) <sub>0.3</sub> | 6.7 × 10 <sup>-3</sup>                                   | 6.6 × 10 <sup>-3</sup> | 0.01                                                                                | 1                                  | This work              |
| Li <sub>7</sub> P <sub>3</sub> S <sub>11</sub>                                                         | 3.2 × 10 <sup>-3</sup>                                   | 1.0 × 10 <sup>-3</sup> | 0.69                                                                                | 36                                 | 4                      |
| Li <sub>7</sub> P <sub>3</sub> S <sub>11</sub>                                                         | 1.7 × 10 <sup>-2</sup>                                   | 9.7 × 10 <sup>-4</sup> | 0.94                                                                                | 37                                 | 5                      |
| Li <sub>7</sub> P <sub>3</sub> S <sub>11</sub>                                                         | 2.9 × 10 <sup>-3</sup>                                   | 2.7 × 10 <sup>-4</sup> | 0.91                                                                                | 38                                 | 7                      |
| Li <sub>6</sub> PS <sub>5</sub> Cl                                                                     | 2.1 × 10 <sup>-3</sup>                                   | 2.2 × 10 <sup>-3</sup> | 0.04                                                                                | 8                                  | 8                      |
| Li <sub>6</sub> PS <sub>5</sub> Cl                                                                     | 2.9 × 10 <sup>-3</sup>                                   | 2.8 × 10 <sup>-3</sup> | 0.05                                                                                | 9                                  | 9                      |
| Li <sub>6</sub> PS <sub>5</sub> Cl                                                                     | 2.9 × 10 <sup>-3</sup>                                   | 1.1 × 10 <sup>-4</sup> | 0.62                                                                                | 10                                 | 10                     |
| Li <sub>6</sub> PS <sub>5</sub> Cl                                                                     | 1.4 × 10 <sup>-3</sup>                                   | 1.4 × 10 <sup>-5</sup> | 0.99                                                                                | 11                                 | 11                     |
| Li <sub>6</sub> PS <sub>5</sub> Cl                                                                     | 3.0 × 10 <sup>-3</sup>                                   | 2.4 × 10 <sup>-3</sup> | 0.85                                                                                | 39                                 | 13                     |
| Li <sub>6</sub> PS <sub>5</sub> Cl                                                                     | 4 × 10 <sup>-5</sup>                                     | 6 × 10 <sup>-4</sup>   | 14                                                                                  | 12                                 | 12                     |
| Li <sub>10</sub> GeP <sub>2</sub> S <sub>12</sub>                                                      | 1.2 × 10 <sup>-2</sup>                                   | 1.6 × 10 <sup>-3</sup> | 0.87                                                                                | 40                                 | 16                     |
| Li <sub>6</sub> PS <sub>5</sub> Br                                                                     | 1.9 × 10 <sup>-3</sup>                                   | 1.4 × 10 <sup>-3</sup> | 0.26                                                                                | 18                                 | 18                     |
| Li <sub>6</sub> PS <sub>5</sub> Br                                                                     | 1.0 × 10 <sup>-4</sup>                                   | 3.4 × 10 <sup>-5</sup> | 0.66                                                                                | 19                                 | 19                     |
| Li <sub>6</sub> PS <sub>5</sub> Br                                                                     | 8.2 × 10 <sup>-4</sup>                                   | 1.9 × 10 <sup>-4</sup> | 0.77                                                                                | 20                                 | 20                     |
| Li <sub>2</sub> S-P <sub>2</sub> S <sub>5</sub>                                                        | 6.7 × 10 <sup>-4</sup>                                   | 3.1 × 10 <sup>-4</sup> | 0.54                                                                                | 28                                 | 28                     |
| Li <sub>3</sub> InCl <sub>6</sub>                                                                      | 1.5 × 10 <sup>-3</sup>                                   | 2.0 × 10 <sup>-3</sup> | 0.36                                                                                | 41                                 | 29                     |
| Li <sub>3.2</sub> P <sub>0.8</sub> Sn <sub>0.2</sub> S <sub>4</sub>                                    | 7.7 × 10 <sup>-4</sup>                                   | 1.9 × 10 <sup>-4</sup> | 0.75                                                                                | 30                                 | 30                     |
| β-Li <sub>3</sub> PS <sub>4</sub>                                                                      | 8.9 × 10 <sup>-7</sup>                                   | 1.6 × 10 <sup>-3</sup> | 1796.75                                                                             | 21                                 | 21                     |
| β-Li <sub>3</sub> PS <sub>4</sub>                                                                      | 4 × 10 <sup>-6</sup>                                     | 3.4 × 10 <sup>-4</sup> | 84                                                                                  | 42                                 | 22                     |
| Li <sub>1.4</sub> Al <sub>0.4</sub> Ge <sub>1.6</sub> (PO <sub>4</sub> ) <sub>3</sub>                  | 3.5 × 10 <sup>-6</sup>                                   | 1.2 × 10 <sup>-3</sup> | 347.57                                                                              | 43                                 | 35                     |

<sup>a</sup>Room temperature (22–30 °C) conductivity of the cold-pressed samples. <sup>b</sup>Conductivity compared in the literature on the liquid-phase synthesis.



**Fig. S4.** (a) Ionic conductivities of various solid electrolytes synthesized by the aqueous liquid-phase method. (b) Change rates of ionic conductivities of the aqueous liquid-phase and solid-phase samples.

**Table S4.** Synthetic temperatures and ionic conductivities of various solid electrolytes synthesized by aqueous liquid–phase method.

| Material                                                                                               | Solvent  | Synthetic temperature <sup>a</sup> (°C) | Ionic conductivity <sup>b</sup> (S cm <sup>-1</sup> ) | References |
|--------------------------------------------------------------------------------------------------------|----------|-----------------------------------------|-------------------------------------------------------|------------|
| Li(CB <sub>9</sub> H <sub>10</sub> ) <sub>0.7</sub> (CB <sub>11</sub> H <sub>12</sub> ) <sub>0.3</sub> | DI water | 200                                     | 6.6 × 10 <sup>-3</sup>                                | This work  |
| Li <sub>3</sub> InCl <sub>6</sub>                                                                      | DI water | 200                                     | 2.0 × 10 <sup>-3</sup>                                | 29         |
| Li <sub>4</sub> SnS <sub>4</sub>                                                                       | DI water | 320                                     | 1.4 × 10 <sup>-4</sup>                                | 31         |
| Na <sub>3.75</sub> Sn <sub>0.75</sub> Sb <sub>0.25</sub> S <sub>4</sub>                                | DI water | 450                                     | 2.0 × 10 <sup>-4</sup>                                | 44         |
| Na <sub>3.75</sub> Sn <sub>0.75</sub> Sb <sub>0.25</sub> S <sub>4</sub>                                | DI water | 550                                     | 5.0 × 10 <sup>-4</sup>                                | 44         |
| Na <sub>3</sub> SbS <sub>4</sub>                                                                       | DI water | 200                                     | 1.5 × 10 <sup>-4</sup>                                | 45         |
| Li <sub>6.28</sub> Al <sub>0.24</sub> La <sub>3</sub> Zr <sub>2</sub> O <sub>12</sub>                  | DI water | 1200                                    | 5.1 × 10 <sup>-4</sup>                                | 33         |

<sup>a</sup>The highest heat treatment temperature in the previous reports; <sup>b</sup>Room temperature (22–30 °C) conductivity of the cold-pressed samples.

**Table S5.** Ionic conductivities of various solid electrolytes synthesized by solid-phase and aqueous liquid-phase methods.

| Material                                                                                               | Ionic conductivity <sup>a</sup><br>(S cm <sup>-1</sup> ) |                        | $ 1 - \frac{\sigma_{\text{Liquid-phase}}}{\sigma_{\text{Solid-phase}}} $ | References                         |                        |
|--------------------------------------------------------------------------------------------------------|----------------------------------------------------------|------------------------|--------------------------------------------------------------------------|------------------------------------|------------------------|
|                                                                                                        | Solid-phase synthesis                                    | Liquid-phase synthesis |                                                                          | Solid-phase synthesis <sup>b</sup> | Liquid-phase synthesis |
| Li(CB <sub>9</sub> H <sub>10</sub> ) <sub>0.7</sub> (CB <sub>11</sub> H <sub>12</sub> ) <sub>0.3</sub> | $6.7 \times 10^{-3}$                                     | $6.6 \times 10^{-3}$   | 0.01                                                                     | 1                                  | This work              |
| Li <sub>3</sub> InCl <sub>6</sub>                                                                      | $5.1 \times 10^{-4}$                                     | $2.0 \times 10^{-3}$   | 3                                                                        | 46                                 | 29                     |
| Li <sub>3</sub> InCl <sub>6</sub>                                                                      | $1.5 \times 10^{-3}$                                     | $2.0 \times 10^{-3}$   | 0.36                                                                     | 41                                 | 29                     |
| Na <sub>3</sub> SbS <sub>4</sub>                                                                       | $1.1 \times 10^{-3}$                                     | $1.5 \times 10^{-4}$   | 0.87                                                                     | 45                                 | 45                     |
| Li <sub>1.4</sub> Al <sub>0.4</sub> Ge <sub>1.6</sub> (PO <sub>4</sub> ) <sub>3</sub>                  | $3.5 \times 10^{-6}$                                     | $1.2 \times 10^{-3}$   | 347.57                                                                   | 43                                 | 35                     |

<sup>a</sup>Room temperature (22–30 °C) conductivity of the cold-pressed samples. <sup>b</sup>Conductivity compared in the literature on the liquid-phase synthesis



**Fig. S5.** Optical images before and after the dissolution of the  $\text{Li}(\text{CB}_9\text{H}_{10})$  powder in DI water.



**Fig. S6.** Optical images before and after the dissolution of the  $\text{Li}(\text{CB}_{11}\text{H}_{12})$  powder in DI water.



**Fig. S7.** Optical images before and after the dissolution of the  $\text{Li}(\text{CB}_9\text{H}_{110})$  and  $\text{Li}(\text{CB}_{11}\text{H}_{12})$  powders in DI water.



**Fig. S8.** Charge–discharge profiles of the cell using  $\text{Li}_6\text{PS}_5\text{Cl}$  solid electrolyte at 0.05, 0.1, 0.2, 0.5, and 1C; at 0.1, 0.2, 0.5, and 1C, the charging rate is fixed as 0.1C. After the first cycle, as the C–rate increased by 2, 4, 10, and 20 times from 0.05C, the cell retained 89.9%, 85.6%, 70.5%, and 55.5% of the capacity ( $198.7 \text{ mAh g}^{-1}$ ) in the second cycle, respectively.



**Fig. S9.** Charge–discharge profiles of the cell using  $\text{Li}(\text{CB}_9\text{H}_{10})_{0.7}(\text{CB}_{11}\text{H}_{12})_{0.3}$  solid electrolyte at 0.1 C and 40 °C.

## REFERENCES

1. S. Kim, H. Oguchi, N. Toyama, T. Sato, S. Takagi, T. Otomo, D. Arunkumar, N. Kuwata, J. Kawamura and S.-I. Orimo, *Nat. Commun.*, 2019, **10**, 1081.
2. E. Rangasamy, Z. Liu, M. Gobet, K. Pilar, G. Sahu, W. Zhou, H. Wu, S. Greenbaum and C. Liang, *J. Am. Chem. Soc.*, 2015, **137**, 1384–1387.
3. N. H. H. Phuc, E. Hirahara, K. Morikawa, H. Muto and A. Matsuda, *J. Power Sources*, 2017, **365**, 7–11.
4. M. Calpa, N. C. Rosero-Navarro, A. Miura and K. Tadanaga, *Inorg. Chem. Front.*, 2018, **5**, 501–508.
5. R. C. Xu, X. H. Xia, Z. J. Yao, X. L. Wang, C. D. Gu and J. P. Tu, *Electrochim. Acta*, 2016, **219**, 235–240.
6. X. Yao, D. Liu, C. Wang, P. Long, G. Peng, Y.-S. Hu, H. Li, L. Chen and X. Xu, *Nano. Lett.*, 2016, **16**, 7148–7154.
7. S. Ito, M. Nakakita, Y. Aihara, T. Uehara and N. Machida, *J. Power Sources*, 2014, **271**, 342–345.
8. A. Han, R. Tian, L. Fang, F. Wan, X. Hu, Z. Zhao, F. Tu, D. Song, X. Zhang and Y. Yang, *ACS Appl. Mater. Interfaces*, 2022, **14**, 30824–30838.
9. R. F. Indrawan, H. Gamo, A. Nagai and A. Matsuda, *Chem. Mater.*, 2023, **35**, 2549–2558.
10. S. Choi, J. Ann, J. Do, S. Lim, C. Park and D. Shin, *J. Electrochem. Soc.*, 2019, **166**, A5193–A5200.
11. S. Yubuchi, S. Teragawa, K. Aso, K. Tadanaga, A. Hayashi and M. Tatsumisago, *J. Power Sources*, 2015, **293**, 941–945.
12. N. C. Rosero-Navarro, A. Miura and K. Tadanaga, *J. Power Sources*, 2018, **396**, 33–40.
13. L. Zhou, K.-H. Park, X. Sun, F. Lalère, T. Adermann, P. Hartmann and L. F. Nazar, *ACS Energy*

- Lett.*, 2018, **4**, 265–270.
14. I.-H. Choi, E. Kim, Y.-S. Jo, J.-W. Hong, J. Sung, J. Seo, B. Kim, J.-h. Park, Y.-J. Lee, Y.-C. Ha, D. Kim, J. H. Lee and J.-W. Park, *J. Ind. Eng. Chem.*, 2023, **121**, 107–113.
  15. R. Maniwa, M. Calpa, N. C. Rosero-Navarro, A. Miura and K. Tadanaga, *J. Mater. Chem. A*, 2021, **9**, 400–405.
  16. K. Hikima, K. Ogawa, H. Gamo and A. Matsuda, *Chem. Commun.*, 2023, **59**, 6564–6567.
  17. D. A. Ziolkowska, W. Arnold, T. Druffel, M. Sunkara and H. Wang, *ACS Appl. Mater. Interfaces*, 2019, **11**, 6015–6021.
  18. S. Yubuchi, M. Uematsu, C. Hotehama, A. Sakuda, A. Hayashi and M. Tatsumisago, *J. Mater. Chem. A*, 2019, **7**, 558–566.
  19. S. Chida, A. Miura, N. C. Rosero-Navarro, M. Higuchi, N. H. H. Phuc, H. Muto, A. Matsuda and K. Tadanaga, *Ceram. Int.*, 2018, **44**, 742–746.
  20. S. Yubuchi, M. Uematsu, M. Deguchi, A. Hayashi and M. Tatsumisago, *ACS Appl. Energy Mater.*, 2018, **1**, 3622–3629.
  21. Z. Liu, W. Fu, E. A. Payzant, X. Yu, Z. Wu, N. J. Dudney, J. Kiggans, K. Hong, A. J. Rondinone and C. Liang, *J. Am. Chem. Soc.*, 2013, **135**, 975–978.
  22. N. H. H. Phuc, M. Totani, K. Morikawa, H. Muto and A. Matsuda, *Solid State Ion.*, 2016, **288**, 240–243.
  23. H. Wang, Z. D. Hood, Y. Xia and C. Liang, *J. Mater. Chem. A*, 2016, **4**, 8091–8096.
  24. H.-D. Lim, X. Yue, X. Xing, V. Petrova, M. Gonzalez, H. Liu and P. Liu, *J. Mater. Chem. A*, 2018, **6**, 7370–7374.
  25. S. J. Sedlmaier, S. Indris, C. Dietrich, M. Yavuz, C. Dräger, F. von Seggern, H. Sommer and J. r. Janek, *Chem. Mater.*, 2017, **29**, 1830–1835.

26. D. Wang, L.-J. Jhang, R. Kou, M. Liao, S. Zheng, H. Jiang, P. Shi, G.-X. Li, K. Meng and D. Wang, *Nat. Commun.*, 2023, **14**, 1895.
27. Y. Song, D. Kim, H. Kwak, D. Han, S. Kang, J. Lee, S.-m. Bak, K. Nam, L. Hyun-wook and Y. Jung, *Nano. Lett.*, 2020, **20**, 4337–4345.
28. S. Choi, S. Lee, J. Park, W. T. Nichols and D. Shin, *Appl. Surf. Sci.*, 2018, **444**, 10–14.
29. X. Li, J. Liang, N. Chen, J. Luo, K. R. Adair, C. Wang, M. N. Banis, T. K. Sham, L. Zhang, S. Zhao, S. Lu, H. Huang, R. Li and X. Sun, *Angew. Chem., Int. Ed.*, 2019, **58**, 16427–16432.
30. J. Woo, Y. Song, H. Kwak, S. Jun, B. Jang, J. Park, K. Kim, C. Park, C. Lee, K.-. Park, Ho, H.-w. Lee and Y. S. Jung, *Adv. Energy Mater.*, 2023, **13**, 2203292.
31. Y. Choi, K. Park, D. Kim, D. Oh, H. Kwak, Y.-G. Lee and Y. Jung, *ChemSusChem.*, 2017, **10**, 2605–2611.
32. K. Park, D. Oh, Y. Choi, Y. Nam, L. Han, J.-y. Kim, H. Xin, F. Lin, S. Oh and Y. Jung, *Adv. Mater.*, 2016, **28**, 1874–1883.
33. L. Dhivya, K. Karthik, S. Ramakumar and R. Murugan, *RSC Adv.*, 2015, **5**, 96042–96051.
34. A. A. Raskovalov, E. A. Il'Ina and B. D. Antonov, *J. Power Sources*, 2013, **238**, 48–52.
35. M. Zhang, K. Takahashi, N. Imanishi, Y. Takeda, O. Yamamoto, B. Chi, J. Pu and J. Li, *J. Electrochem. Soc.*, 2012, **159**, A1114.
36. F. Mizuno, A. Hayashi, K. Tadanaga and M. Tatsumisago, *Solid State Ion.*, 2006, **177**, 2721–2725.
37. Y. Seino, T. Ota, K. Takada, A. Hayashi and M. Tatsumisago, *Energy Environ. Sci.*, 2014, **7**, 627–631.
38. K. Minami, A. Hayashi and M. Tatsumisago, *J. Ceram. Soc. Jpn.*, 2010, **118**, 305–308.
39. S. Boulineau, M. Courty, J. M. Tarascon and V. Viallet, *Solid State Ion.*, 2012, **221**, 1–5.
40. N. Kamaya, K. Homma, Y. Yamakawa, M. Hirayama, R. Kanno, M. Yonemura, T. Kamiyama, Y.

- Kato, S. Hama, K. Kawamoto and A. Mitsui, *Nat. Mater.*, 2011, **10**, 682-686.
41. X. Li, J. Liang, J. Luo, M. N. Banis, C. Wang, W. Li, S. Deng, C. Yu, F. Zhao and Y. Hu, *Energy Environ. Sci.*, 2019, **12**, 2665–2671.
42. K. Homma, M. Yonemura, T. Kobayashi, M. Nagao, M. Hirayama and R. Kanno, *Solid State Ion.*, 2011, **182**, 53–58.
43. J. K. Feng, L. Lu and M. O. Lai, *J. Alloys Compd.*, 2010, **501**, 255–258.
44. J. W. Heo, A. Banerjee, K. Park, Y. Jung and S. Hong, *Adv. Energy Mater.*, 2018, **8**, 1702716.
45. T. Kim, K. Park, Y. Choi, J. Lee and Y. Jung, *J. Mater. Chem. A*, 2018, **6**, 840–844.
46. T. Asano, A. Sakai, S. Ouchi, M. Sakaida, A. Miyazaki and S. Hasegawa, *Adv. Mater.*, 2018, **30**, 1803075.
